# Supplementary material
Source: HighWire-hosted journal article supplement (https://erj.ersjournals.com/content/59/5/2200075)
Supplement: inline-supplementary-material-1 [file inline-supplementary-material-1.pdf]

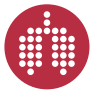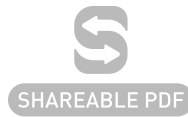

# Extended D-dimer cut-offs and machine learning for ruling out pulmonary embolism in individuals undergoing computed tomography pulmonary angiography

Alessandro N. Franciosi <sup>1,2,7</sup>, Nicholas McCarthy<sup>3,7</sup>, Brian Gaffney <sup>1,4</sup>, John Duignan<sup>4</sup>, Eamon Sweeney<sup>1</sup>, Niall O'Connell<sup>1</sup>, Karen Murphy<sup>5</sup>, Fionnuala Ní Áinle<sup>3,6</sup>, Marcus W. Butler<sup>1,3</sup>, Jonathan D. Dodd<sup>3,4</sup>, Michael P. Keane<sup>1,3</sup>, David J. Murphy<sup>3,4</sup>, Kathleen M. Curran<sup>3</sup> and Cormac McCarthy <sup>1,3</sup>

<sup>1</sup>Dept of Respiratory Medicine, St. Vincent's University Hospital, Dublin, Ireland. <sup>2</sup>Faculty of Medicine, University of British Columbia, Vancouver, BC, Canada. <sup>3</sup>School of Medicine, University College Dublin, Dublin, Ireland. <sup>4</sup>Dept of Radiology, St. Vincent's University Hospital, Dublin, Ireland. <sup>5</sup>Dept of Haematology, St Vincent's University Hospital, Dublin, Ireland. <sup>6</sup>Dept of Haematology, Mater Misericordiae Hospital, Dublin, Ireland. <sup>7</sup>Denotes joint first authorship.

Corresponding author: Cormac McCarthy ([Cormac.McCarthy@UCD.ie](mailto:Cormac.McCarthy@UCD.ie))

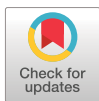

Shareable abstract (@ERSpublications)

Combining novel machine learning algorithms with extended D-dimer cut-offs may improve pulmonary embolism prediction and reduce patient radiation exposure resulting from avoidable scans <https://bit.ly/3oUKd7X>

**Cite this article as:** Franciosi AN, McCarthy N, Gaffney B, *et al.* Extended D-dimer cut-offs and machine learning for ruling out pulmonary embolism in individuals undergoing computed tomography pulmonary angiography. *Eur Respir J* 2022; 59: 2200075 [DOI: 10.1183/13993003.00075-2022].

This single-page version can be shared freely online.

Copyright ©The authors 2022.  
For reproduction rights and  
permissions contact  
[permissions@ersnet.org](mailto:permissions@ersnet.org)

Received: 22 Nov 2021  
Accepted: 7 Feb 2022

*To the Editor:*

Pulmonary embolism (PE) is a major cause of morbidity and mortality [1]. Computed tomography pulmonary angiography (CTPA) is the gold standard for diagnosing PE [2] and a common investigation which contributes to potentially avoidable radiation exposure. CTPA use has quadrupled in the past two decades [3], and this has been associated with lower rates of PE detection [4] and possible overdiagnosis [5].
